# Supplementary material for: Gene-Based Methods for Estimating the Degree of the Skewness of X Chromosome Inactivation
Source: Genes (Basel). 2022 May 6;13(5):827. doi: 10.3390/genes13050827 (PMC9140558; doi:10.3390/genes13050827)
Supplement: Supplementary file 1 [file genes-13-00827-s001.zip › genes-1705332-supplementary.pdf]

## Supplementary Material

# Gene-Based Methods for Estimating the Degree of the Skewness of X Chromosome Inactivation

**Table S1.** Results of point estimations and interval estimations for  $\gamma$  among 500 replications with  $n=3000$  and 4000,  $\eta = 1$  and  $\tau = 1$  for qualitative trait.

| Estimation          | Index                                         | Method               | $n = 3000$ | $n = 4000$ |
|---------------------|-----------------------------------------------|----------------------|------------|------------|
| Point estimation    | Proportion of extreme values being 0 (%)      | $\hat{\gamma}_{GPF}$ | 11.6       | 7.0        |
|                     | Proportion of extreme values being 0 (%)      | $\hat{\gamma}_{GF}$  | 11.6       | 7.0        |
|                     | Proportion of extreme values being 2 (%)      | $\hat{\gamma}_{GPF}$ | 14.6       | 11.0       |
|                     | Proportion of extreme values being 2 (%)      | $\hat{\gamma}_{GF}$  | 21.0       | 15.8       |
|                     | Proportion of extreme values being 0 or 2 (%) | $\hat{\gamma}_{GPF}$ | 26.2       | 18.0       |
|                     | Proportion of extreme values being 0 or 2 (%) | $\hat{\gamma}_{GF}$  | 32.6       | 22.8       |
|                     | MSE                                           | $\hat{\gamma}_{GPF}$ | 0.2160     | 0.1683     |
|                     | MSE                                           | $\hat{\gamma}_{GF}$  | 0.2261     | 0.1783     |
|                     | MSE                                           | $\hat{\gamma}_{GPF}$ | 0.3697     | 0.2515     |
|                     | MSE                                           | $\hat{\gamma}_{GF}$  | 0.4305     | 0.3061     |
| Interval estimation | EP (%)                                        | PF                   | 8.2        | 4.8        |
|                     | EP (%)                                        | Fieller              | 1.4        | 0.0        |
|                     | NP (%)                                        | PF                   | 1.8        | 1.4        |
|                     | NP (%)                                        | Fieller              | 5.6        | 3.4        |
|                     | DP (%)                                        | PF                   | 0.0        | 0.0        |
|                     | DP (%)                                        | Fieller              | 0.2        | 0.0        |
|                     | CP (%)                                        | GBN                  | 92.6       | 93.2       |
|                     | CP (%)                                        | GBU                  | 93.2       | 94.0       |
|                     | CP (%)                                        | PF                   | 88.2       | 91.4       |
|                     | CP (%)                                        | Fieller              | 96.4       | 96.4       |
|                     | $W_{mean}$                                    | GBN                  | 1.3001     | 1.2427     |
|                     | $W_{mean}$                                    | GBU                  | 1.3135     | 1.2557     |
|                     | $W_{mean}$                                    | PF                   | 1.3283     | 1.2916     |
|                     | $W_{mean}$                                    | Fieller              | 1.4720     | 1.3757     |
|                     | $W_{median}$                                  | GBN                  | 1.3539     | 1.3137     |
|                     | $W_{median}$                                  | GBU                  | 1.3916     | 1.3350     |
|                     | $W_{median}$                                  | PF                   | 1.6042     | 1.5098     |
|                     | $W_{median}$                                  | Fieller              | 1.5946     | 1.4778     |
|                     | $W_{sd}$                                      | GBN                  | 0.2723     | 0.2893     |
|                     | $W_{sd}$                                      | GBU                  | 0.3059     | 0.3206     |
|                     | $W_{sd}$                                      | PF                   | 0.6399     | 0.5807     |
|                     | $W_{sd}$                                      | Fieller              | 0.4499     | 0.4627     |
|                     | $W_{iqr}$                                     | GBN                  | 0.3002     | 0.2744     |
|                     | $W_{iqr}$                                     | GBU                  | 0.3428     | 0.3181     |
|                     | $W_{iqr}$                                     | PF                   | 0.8050     | 0.6589     |
|                     | $W_{iqr}$                                     | Fieller              | 0.5292     | 0.5173     |

**Table S2.** MSEs of  $\hat{\gamma}_{GBN}$ ,  $\hat{\gamma}_{GBU}$ ,  $\hat{\gamma}_{GPF}$  and  $\hat{\gamma}_{GF}$  among 500 replications with  $n = 2000$  and  $\sigma = 2$  for quantitative trait.

| $\eta^a$ | $\tau^b$ | $\hat{\gamma}_{GBN}$ | $\hat{\gamma}_{GBU}$ | $\hat{\gamma}_{GPF}$ | $\hat{\gamma}_{GF}$ |
|----------|----------|----------------------|----------------------|----------------------|---------------------|
| 0        | 0.6      | 0.1215               | 0.1325               | 0.1510               | 0.1607              |
| 0        | 1        | 0.1481               | 0.1996               | 0.2324               | 0.2500              |
| 0.4      | 0.6      | 0.1238               | 0.1336               | 0.1727               | 0.1829              |
| 0.4      | 1        | 0.1957               | 0.2196               | 0.3202               | 0.3763              |
| 1        | 0.6      | 0.1315               | 0.1445               | 0.2048               | 0.2212              |
| 1        | 1        | 0.1637               | 0.1703               | 0.2603               | 0.3208              |

<sup>a</sup> Proportion of rare variants among all the SNPs; <sup>b</sup> proportion of the SNPs with positive effects among all the SNPs.

**Table S3.** CPs (%),  $W_{mean}$  and  $W_{median}$  of GBN, GBU, PF and Fieller's methods among 500 replications with  $n = 2000$  and  $\sigma = 2$  for quantitative trait.

| $\eta^a$ | $\tau^b$ | CP    |       |       |         | $W_{mean}$ |        |        |         | $W_{median}$ |        |        |         |
|----------|----------|-------|-------|-------|---------|------------|--------|--------|---------|--------------|--------|--------|---------|
|          |          | GBN   | GBU   | PF    | Fieller | GBN        | GBU    | PF     | Fieller | GBN          | GBU    | PF     | Fieller |
| 0        | 0.6      | 95.40 | 95.60 | 95.80 | 94.40   | 1.2300     | 1.2456 | 1.2557 | 1.2790  | 1.2417       | 1.2535 | 1.2283 | 1.2318  |
| 0        | 1        | 96.00 | 94.40 | 97.20 | 95.60   | 1.3664     | 1.3808 | 1.4696 | 1.4605  | 1.3716       | 1.3938 | 1.4829 | 1.4885  |
| 0.4      | 0.6      | 94.80 | 94.80 | 95.40 | 94.60   | 1.2835     | 1.3020 | 1.2819 | 1.3162  | 1.3040       | 1.3320 | 1.2313 | 1.2531  |
| 0.4      | 1        | 95.60 | 95.00 | 90.40 | 92.60   | 1.4447     | 1.4668 | 1.4994 | 1.5239  | 1.4833       | 1.5214 | 1.6226 | 1.6201  |
| 1        | 0.6      | 97.00 | 98.00 | 96.80 | 97.00   | 1.3671     | 1.3930 | 1.3895 | 1.4353  | 1.4024       | 1.4492 | 1.3481 | 1.3987  |
| 1        | 1        | 95.20 | 95.60 | 88.00 | 94.80   | 1.2857     | 1.3070 | 1.2886 | 1.4029  | 1.3224       | 1.3557 | 1.5152 | 1.4959  |

<sup>a</sup> Proportion of rare variants among all the SNPs; <sup>b</sup> proportion of the SNPs with positive effects among all the SNPs.

**Table S4.**  $W_{sd}$  and  $W_{iqr}$  of GBN, GBU, PF and Fieller's methods among 500 replications with  $n = 2000$  and  $\sigma = 2$  for quantitative trait.

| $\eta^a$ | $\tau^b$ | $W_{sd}$ |        |        |         | $W_{iqr}$ |        |        |         |
|----------|----------|----------|--------|--------|---------|-----------|--------|--------|---------|
|          |          | GBN      | GBU    | PF     | Fieller | GBN       | GBU    | PF     | Fieller |
| 0        | 0.6      | 0.3550   | 0.3884 | 0.4446 | 0.5132  | 0.5844    | 0.6631 | 0.6436 | 0.8370  |
| 0        | 1        | 0.2842   | 0.3186 | 0.4208 | 0.4704  | 0.4259    | 0.4848 | 0.6339 | 0.7550  |
| 0.4      | 0.6      | 0.3470   | 0.3801 | 0.4507 | 0.5316  | 0.5757    | 0.6536 | 0.6900 | 1.0767  |
| 0.4      | 1        | 0.2664   | 0.2976 | 0.5142 | 0.4707  | 0.3981    | 0.4419 | 0.7020 | 0.7523  |
| 1        | 0.6      | 0.3387   | 0.3686 | 0.4271 | 0.4996  | 0.5815    | 0.6371 | 0.7282 | 0.9717  |
| 1        | 1        | 0.2684   | 0.2977 | 0.6027 | 0.4591  | 0.2981    | 0.3539 | 0.7601 | 0.5371  |

<sup>a</sup> Proportion of rare variants among all the SNPs; <sup>b</sup> proportion of the SNPs with positive effects among all the SNPs.

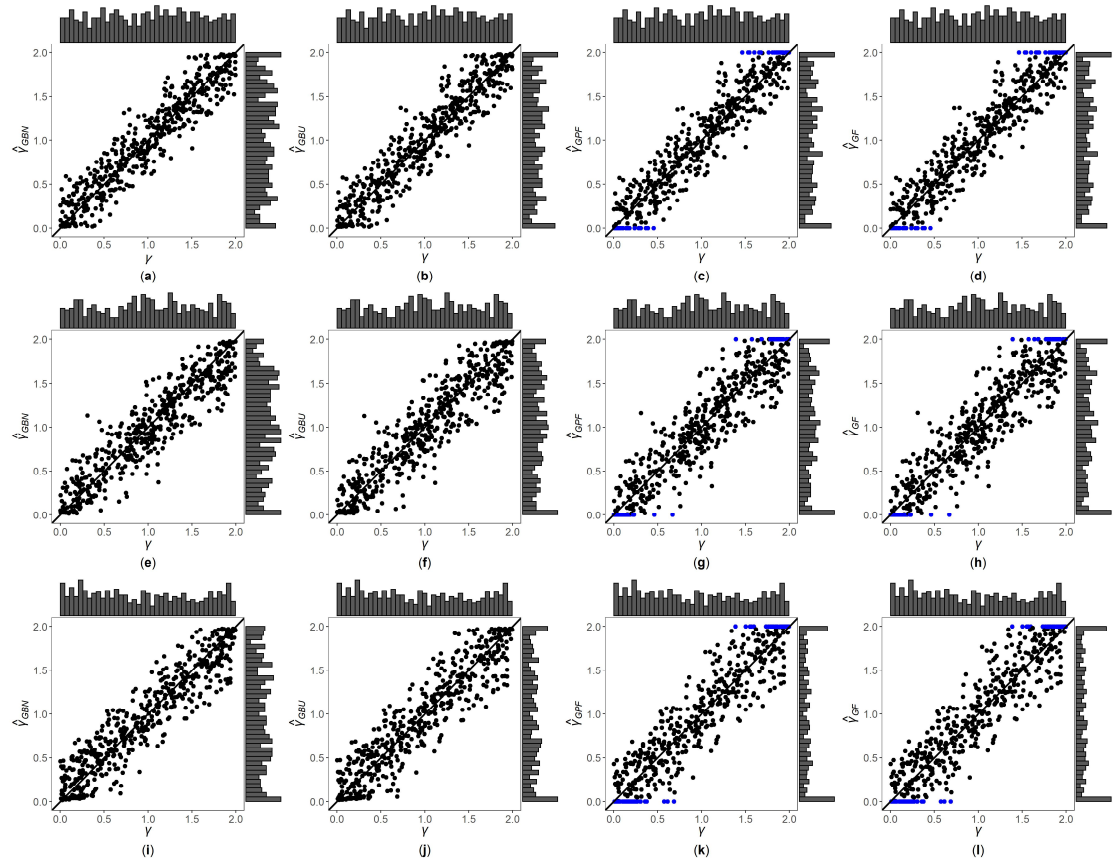

**Figure S1.** Scatter plots of point estimates of  $\gamma$  against true values of  $\gamma$  for quantitative trait with  $n = 2000$ ,  $\tau = 0.6$  and  $\sigma = 1$ . The blue points represent the extreme values (0 or 2). (a)  $\hat{\gamma}_{GBN}$  with  $\eta = 0$ ; (b)  $\hat{\gamma}_{GBU}$  with  $\eta = 0$ ; (c)  $\hat{\gamma}_{GPF}$  with  $\eta = 0$ ; (d)  $\hat{\gamma}_{GF}$  with  $\eta = 0$ ; (e)  $\hat{\gamma}_{GBN}$  with  $\eta = 0.4$ ; (f)  $\hat{\gamma}_{GBU}$  with  $\eta = 0.4$ ; (g)  $\hat{\gamma}_{GPF}$  with  $\eta = 0.4$ ; (h)  $\hat{\gamma}_{GF}$  with  $\eta = 0.4$ ; (i)  $\hat{\gamma}_{GBN}$  with  $\eta = 1$ ; (j)  $\hat{\gamma}_{GBU}$  with  $\eta = 1$ ; (k)  $\hat{\gamma}_{GPF}$  with  $\eta = 1$ ; (l)  $\hat{\gamma}_{GF}$  with  $\eta = 1$ .

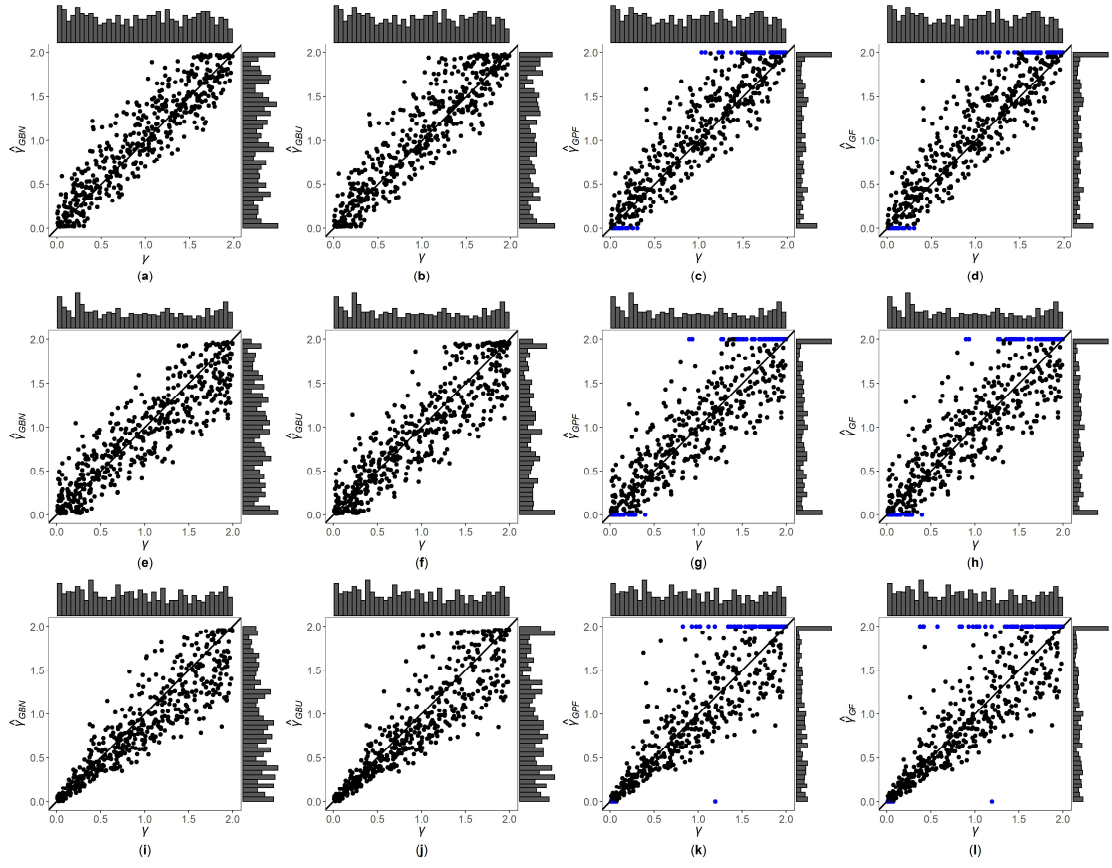

**Figure S2.** Scatter plots of point estimates of  $\gamma$  against true values of  $\gamma$  for quantitative trait with  $n = 2000$ ,  $\tau = 1$  and  $\sigma = 1$ . The blue points represent the extreme values (0 or 2). (a)  $\hat{\gamma}_{GBN}$  with  $\eta = 0$ ; (b)  $\hat{\gamma}_{GBU}$  with  $\eta = 0$ ; (c)  $\hat{\gamma}_{GPF}$  with  $\eta = 0$ ; (d)  $\hat{\gamma}_{GF}$  with  $\eta = 0$ ; (e)  $\hat{\gamma}_{GBN}$  with  $\eta = 0.4$ ; (f)  $\hat{\gamma}_{GBU}$  with  $\eta = 0.4$ ; (g)  $\hat{\gamma}_{GPF}$  with  $\eta = 0.4$ ; (h)  $\hat{\gamma}_{GF}$  with  $\eta = 0.4$ ; (i)  $\hat{\gamma}_{GBN}$  with  $\eta = 1$ ; (j)  $\hat{\gamma}_{GBU}$  with  $\eta = 1$ ; (k)  $\hat{\gamma}_{GPF}$  with  $\eta = 1$ ; (l)  $\hat{\gamma}_{GF}$  with  $\eta = 1$ .

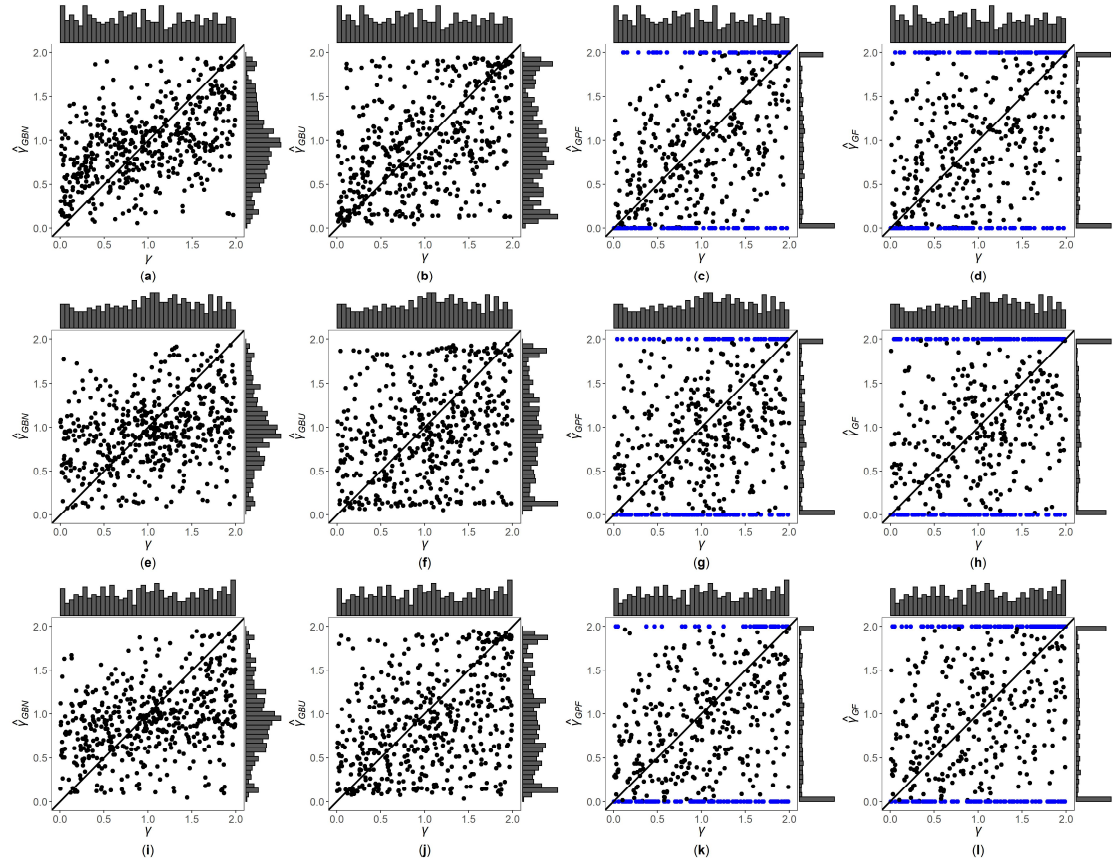

**Figure S3.** Scatter plots of point estimates of  $\gamma$  against true values of  $\gamma$  for qualitative trait with  $n = 500$  and  $\tau = 0.6$ . The blue points represent the extreme values (0 or 2). (a)  $\hat{\gamma}_{GBN}$  with  $\eta = 0$ ; (b)  $\hat{\gamma}_{GBU}$  with  $\eta = 0$ ; (c)  $\hat{\gamma}_{GPF}$  with  $\eta = 0$ ; (d)  $\hat{\gamma}_{GF}$  with  $\eta = 0$ ; (e)  $\hat{\gamma}_{GBN}$  with  $\eta = 0.4$ ; (f)  $\hat{\gamma}_{GBU}$  with  $\eta = 0.4$ ; (g)  $\hat{\gamma}_{GPF}$  with  $\eta = 0.4$ ; (h)  $\hat{\gamma}_{GF}$  with  $\eta = 0.4$ ; (i)  $\hat{\gamma}_{GBN}$  with  $\eta = 1$ ; (j)  $\hat{\gamma}_{GBU}$  with  $\eta = 1$ ; (k)  $\hat{\gamma}_{GPF}$  with  $\eta = 1$ ; (l)  $\hat{\gamma}_{GF}$  with  $\eta = 1$ .

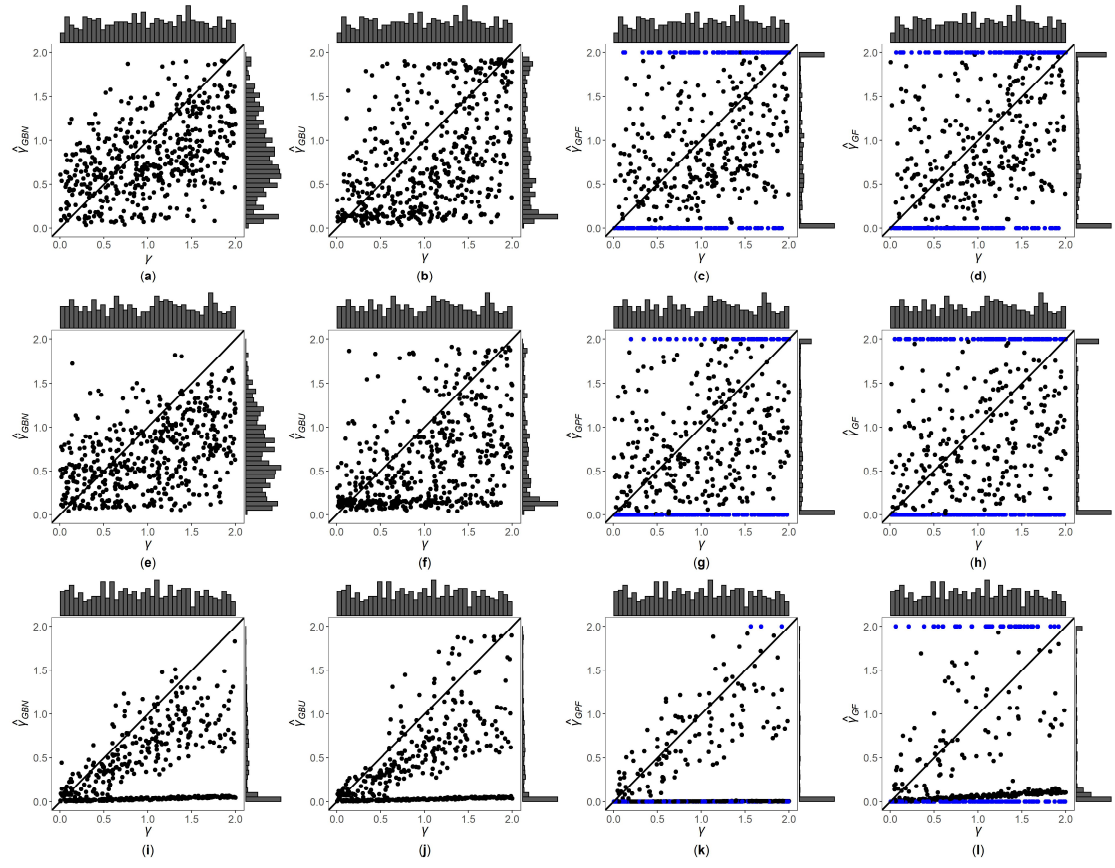

**Figure S4.** Scatter plots of point estimates of  $\gamma$  against true values of  $\gamma$  for qualitative trait with  $n = 500$  and  $\tau = 1$ . The blue points represent the extreme values (0 or 2). (a)  $\hat{\gamma}_{GBN}$  with  $\eta = 0$ ; (b)  $\hat{\gamma}_{GBU}$  with  $\eta = 0$ ; (c)  $\hat{\gamma}_{GPF}$  with  $\eta = 0$ ; (d)  $\hat{\gamma}_{GF}$  with  $\eta = 0$ ; (e)  $\hat{\gamma}_{GBN}$  with  $\eta = 0.4$ ; (f)  $\hat{\gamma}_{GBU}$  with  $\eta = 0.4$ ; (g)  $\hat{\gamma}_{GPF}$  with  $\eta = 0.4$ ; (h)  $\hat{\gamma}_{GF}$  with  $\eta = 0.4$ ; (i)  $\hat{\gamma}_{GBN}$  with  $\eta = 1$ ; (j)  $\hat{\gamma}_{GBU}$  with  $\eta = 1$ ; (k)  $\hat{\gamma}_{GPF}$  with  $\eta = 1$ ; (l)  $\hat{\gamma}_{GF}$  with  $\eta = 1$ .

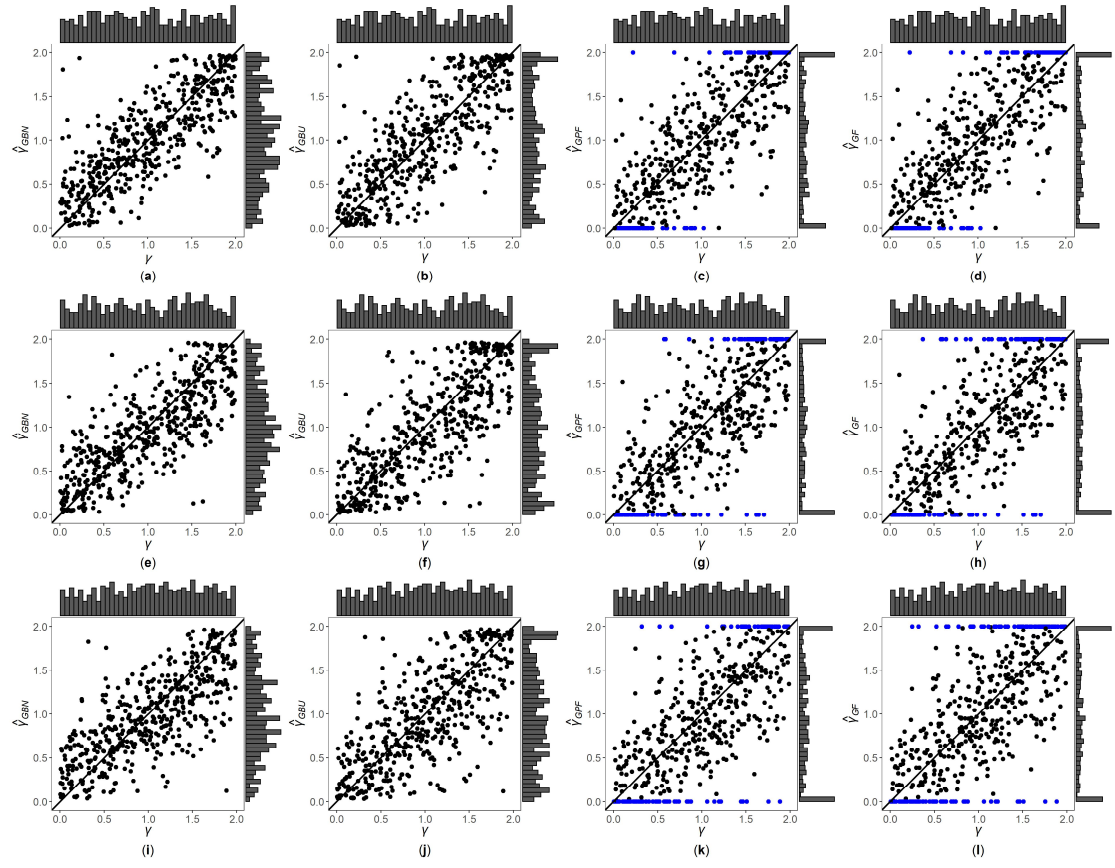

**Figure S5.** Scatter plots of point estimates of  $\gamma$  against true values of  $\gamma$  for qualitative trait with  $n = 2000$  and  $\tau = 0.6$ . The blue points represent the extreme values (0 or 2). (a)  $\hat{\gamma}_{GBN}$  with  $\eta = 0$ ; (b)  $\hat{\gamma}_{GBU}$  with  $\eta = 0$ ; (c)  $\hat{\gamma}_{GPF}$  with  $\eta = 0$ ; (d)  $\hat{\gamma}_{GF}$  with  $\eta = 0$ ; (e)  $\hat{\gamma}_{GBN}$  with  $\eta = 0.4$ ; (f)  $\hat{\gamma}_{GBU}$  with  $\eta = 0.4$ ; (g)  $\hat{\gamma}_{GPF}$  with  $\eta = 0.4$ ; (h)  $\hat{\gamma}_{GF}$  with  $\eta = 0.4$ ; (i)  $\hat{\gamma}_{GBN}$  with  $\eta = 1$ ; (j)  $\hat{\gamma}_{GBU}$  with  $\eta = 1$ ; (k)  $\hat{\gamma}_{GPF}$  with  $\eta = 1$ ; (l)  $\hat{\gamma}_{GF}$  with  $\eta = 1$ .

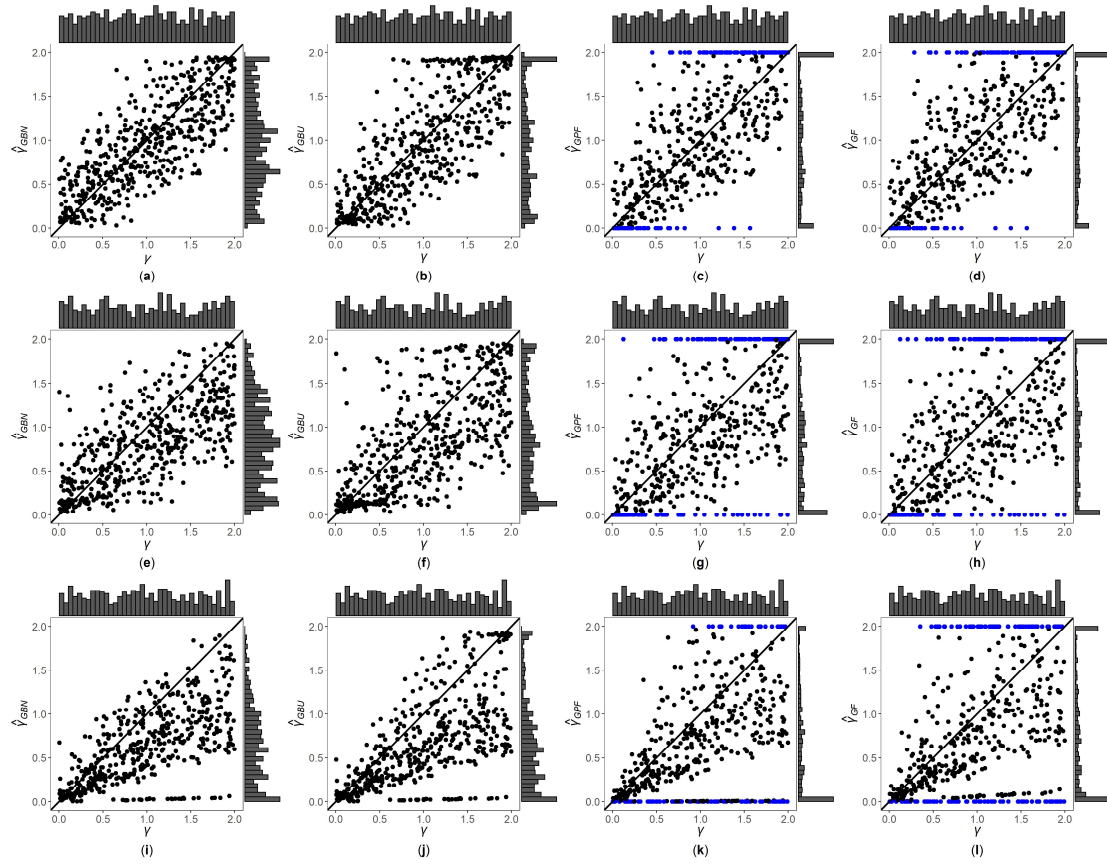

**Figure S6.** Scatter plots of point estimates of  $\gamma$  against true values of  $\gamma$  for qualitative trait with  $n = 2000$  and  $\tau = 1$ . The blue points represent the extreme values (0 or 2). (a)  $\hat{\gamma}_{GBN}$  with  $\eta = 0$ ; (b)  $\hat{\gamma}_{GBU}$  with  $\eta = 0$ ; (c)  $\hat{\gamma}_{GPF}$  with  $\eta = 0$ ; (d)  $\hat{\gamma}_{GF}$  with  $\eta = 0$ ; (e)  $\hat{\gamma}_{GBN}$  with  $\eta = 0.4$ ; (f)  $\hat{\gamma}_{GBU}$  with  $\eta = 0.4$ ; (g)  $\hat{\gamma}_{GPF}$  with  $\eta = 0.4$ ; (h)  $\hat{\gamma}_{GF}$  with  $\eta = 0.4$ ; (i)  $\hat{\gamma}_{GBN}$  with  $\eta = 1$ ; (j)  $\hat{\gamma}_{GBU}$  with  $\eta = 1$ ; (k)  $\hat{\gamma}_{GPF}$  with  $\eta = 1$ ; (l)  $\hat{\gamma}_{GF}$  with  $\eta = 1$ .

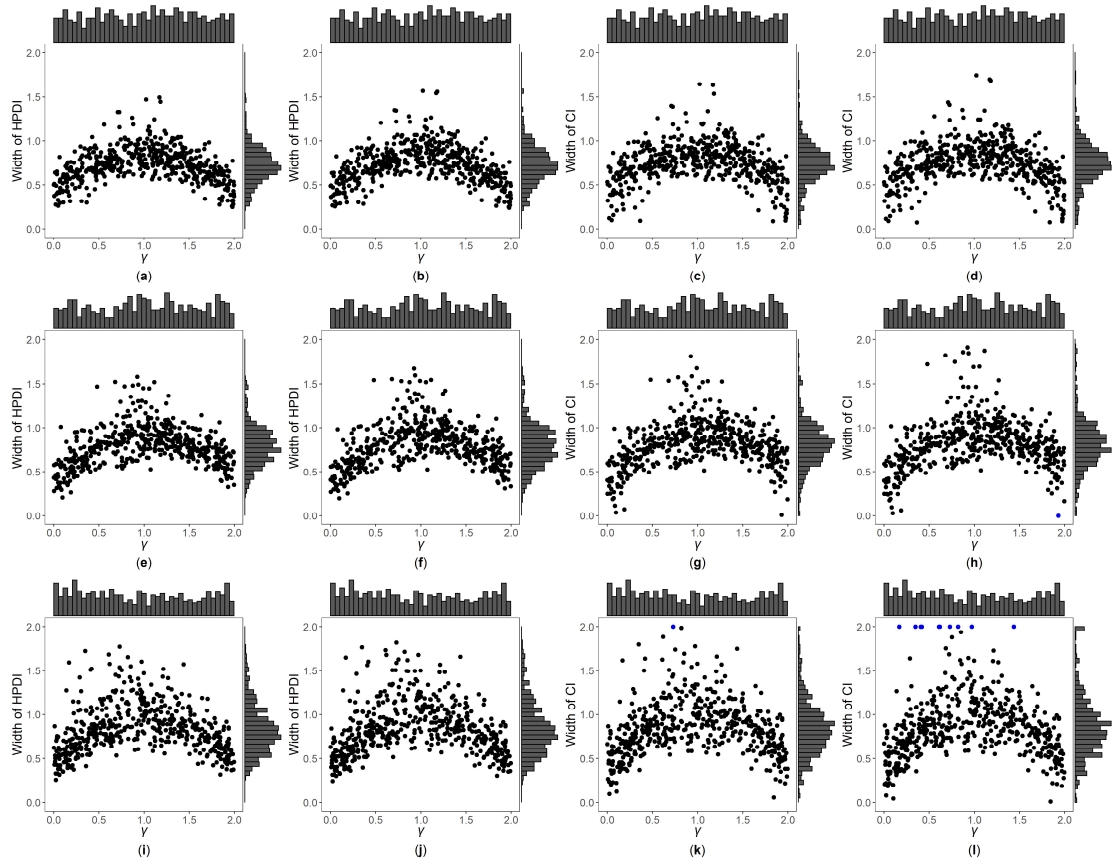

**Figure S7.** Widths of HPDIs or CIs of GBN, GBU, PF and Fieller's methods against true values of  $\gamma$  for quantitative trait with  $n = 2000$ ,  $\tau = 0.6$  and  $\sigma = 1$ . The blue points represent the widths of the empty sets or the noninformative intervals. (a) GBN with  $\eta = 0$ ; (b) GBU with  $\eta = 0$ ; (c) PF with  $\eta = 0$ ; (d) Fieller with  $\eta = 0$ ; (e) GBN with  $\eta = 0.4$ ; (f) GBU with  $\eta = 0.4$ ; (g) PF with  $\eta = 0.4$ ; (h) Fieller with  $\eta = 0.4$ ; (i) GBN with  $\eta = 1$ ; (j) GBU with  $\eta = 1$ ; (k) PF with  $\eta = 1$ ; (l) Fieller with  $\eta = 1$ .

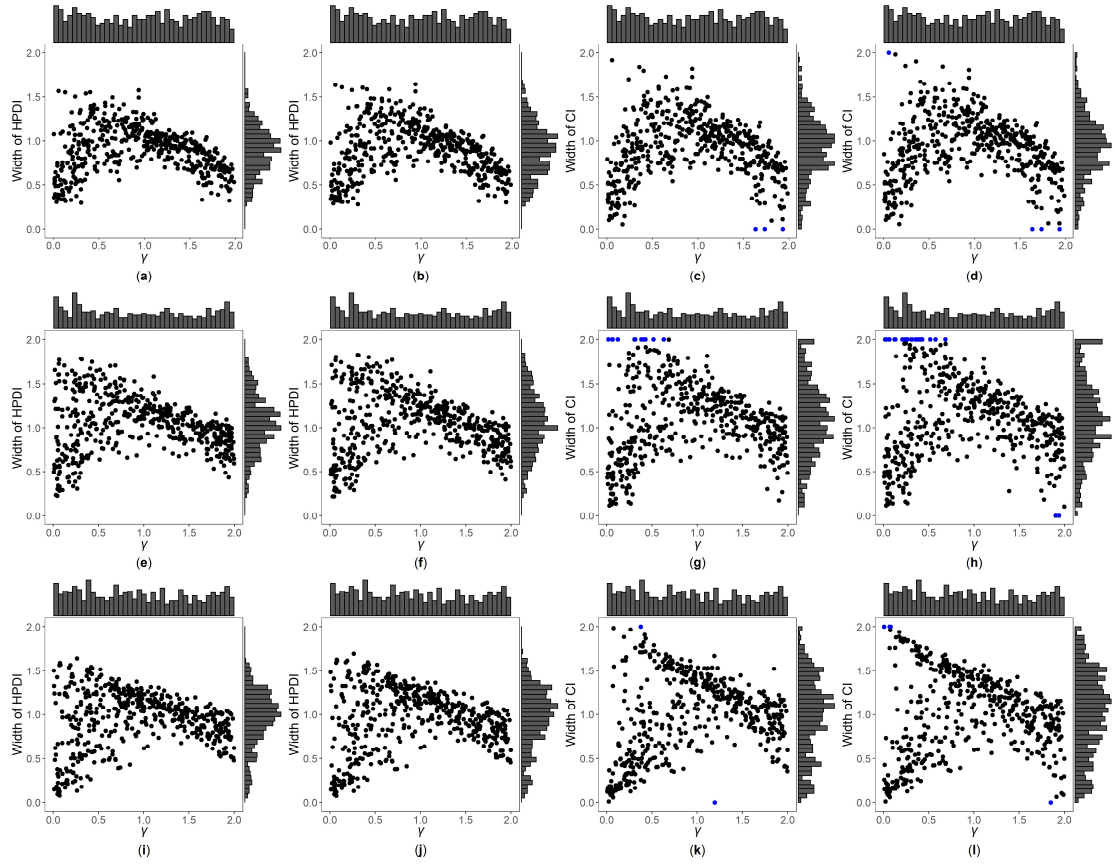

**Figure S8.** Widths of HPDIs or CIs of GBN, GBU, PF and Fieller's methods against true values of  $\gamma$  for quantitative trait with  $n = 2000$ ,  $\tau = 1$  and  $\sigma = 1$ . (a) GBN with  $\eta = 0$ ; (b) GBU with  $\eta = 0$ ; (c) PF with  $\eta = 0$ ; (d) Fieller with  $\eta = 0$ ; (e) GBN with  $\eta = 0.4$ ; (f) GBU with  $\eta = 0.4$ ; (g) PF with  $\eta = 0.4$ ; (h) Fieller with  $\eta = 0.4$ ; (i) GBN with  $\eta = 1$ ; (j) GBU with  $\eta = 1$ ; (k) PF with  $\eta = 1$ ; (l) Fieller with  $\eta = 1$ .

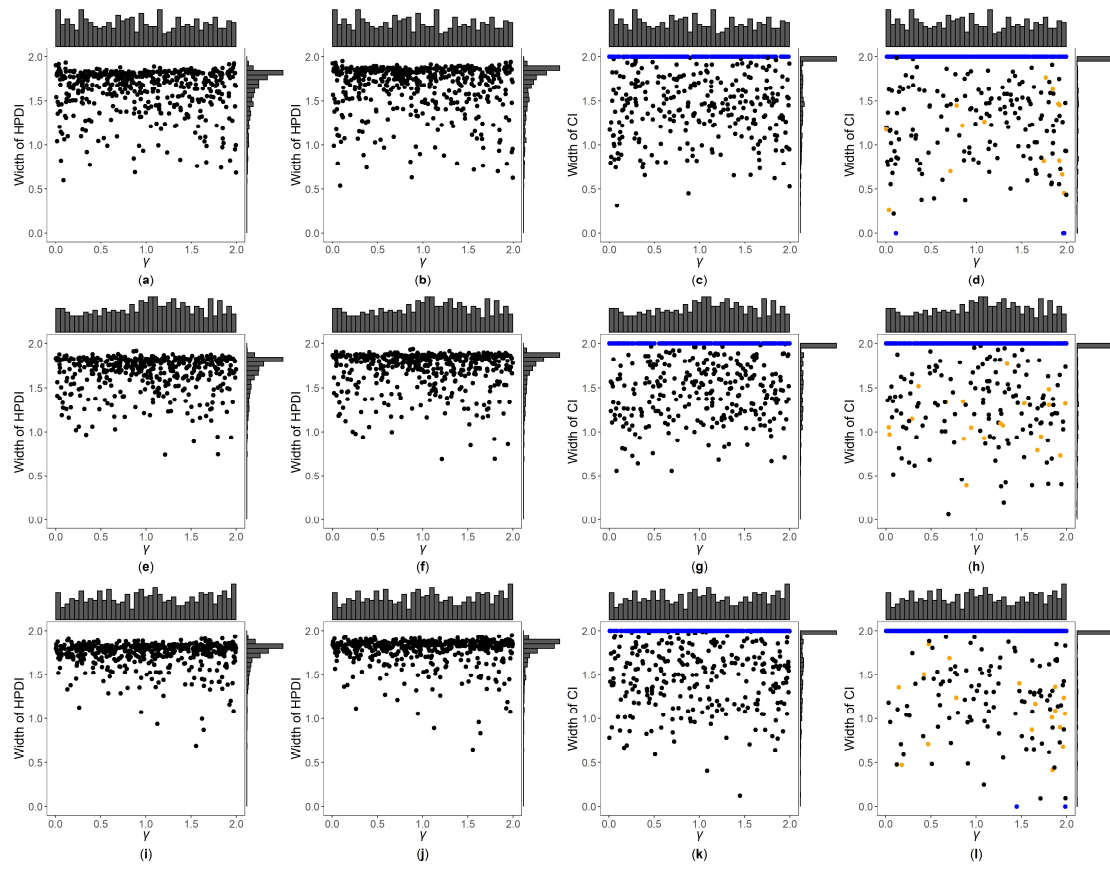

**Figure S9.** Widths of HPDIs or CIs of GBN, GBU, PF and Fieller's methods against true values of  $\gamma$  for qualitative trait with  $n = 500$  and  $\tau = 0.6$ . The blue points represent the widths of the empty sets or the noninformative intervals, and the orange points represent the widths of the discontinuous intervals. (a) GBN with  $\eta = 0$ ; (b) GBU with  $\eta = 0$ ; (c) PF with  $\eta = 0$ ; (d) Fieller with  $\eta = 0$ ; (e) GBN with  $\eta = 0.4$ ; (f) GBU with  $\eta = 0.4$ ; (g) PF with  $\eta = 0.4$ ; (h) Fieller with  $\eta = 0.4$ ; (i) GBN with  $\eta = 1$ ; (j) GBU with  $\eta = 1$ ; (k) PF with  $\eta = 1$ ; (l) Fieller with  $\eta = 1$ .

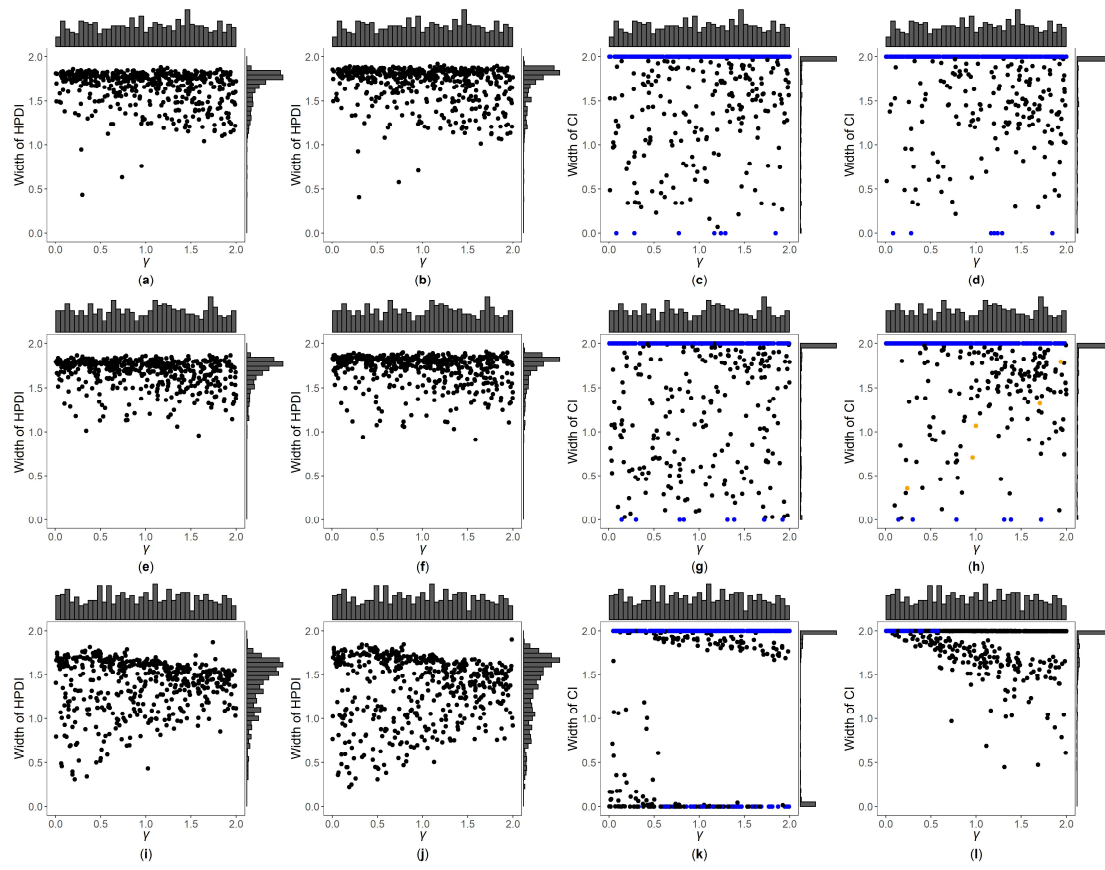

**Figure S10.** Widths of HPDIs or CIs of GBN, GBU, PF and Fieller's methods against true values of  $\gamma$  for qualitative trait with  $n = 500$  and  $\tau = 1$ . The blue points represent the widths of the empty sets or the noninformative intervals, and the orange points represent the widths of the discontinuous intervals. (a) GBN with  $\eta = 0$ ; (b) GBU with  $\eta = 0$ ; (c) PF with  $\eta = 0$ ; (d) Fieller with  $\eta = 0$ ; (e) GBN with  $\eta = 0.4$ ; (f) GBU with  $\eta = 0.4$ ; (g) PF with  $\eta = 0.4$ ; (h) Fieller with  $\eta = 0.4$ ; (i) GBN with  $\eta = 1$ ; (j) GBU with  $\eta = 1$ ; (k) PF with  $\eta = 1$ ; (l) Fieller with  $\eta = 1$ .

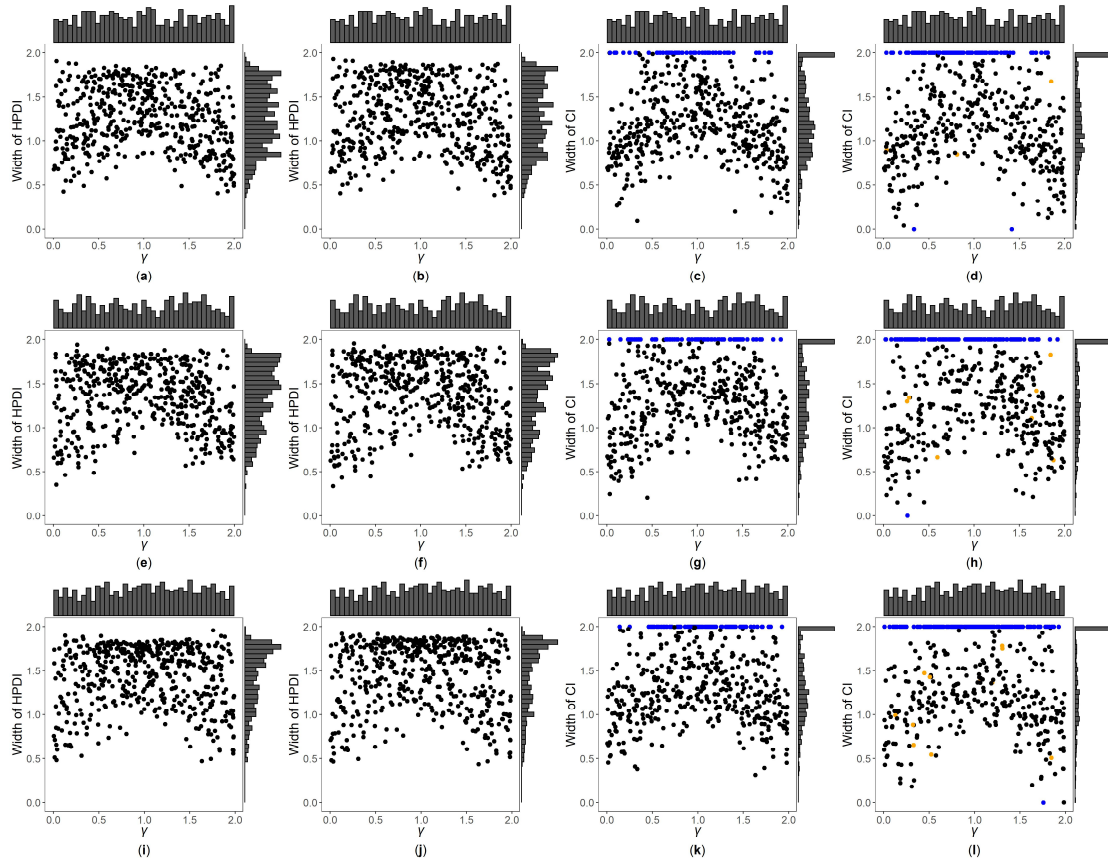

**Figure S11.** Widths of HPDIs or CIs of GBN, GBU, PF and Fieller's methods against true values of  $\gamma$  for qualitative trait with  $n = 2000$  and  $\tau = 0.6$ . The blue points represent the widths of the empty sets or the noninformative intervals, and the orange points represent the widths of the discontinuous intervals. (a) GBN with  $\eta = 0$ ; (b) GBU with  $\eta = 0$ ; (c) PF with  $\eta = 0$ ; (d) Fieller with  $\eta = 0$ ; (e) GBN with  $\eta = 0.4$ ; (f) GBU with  $\eta = 0.4$ ; (g) PF with  $\eta = 0.4$ ; (h) Fieller with  $\eta = 0.4$ ; (i) GBN with  $\eta = 1$ ; (j) GBU with  $\eta = 1$ ; (k) PF with  $\eta = 1$ ; (l) Fieller with  $\eta = 1$ .

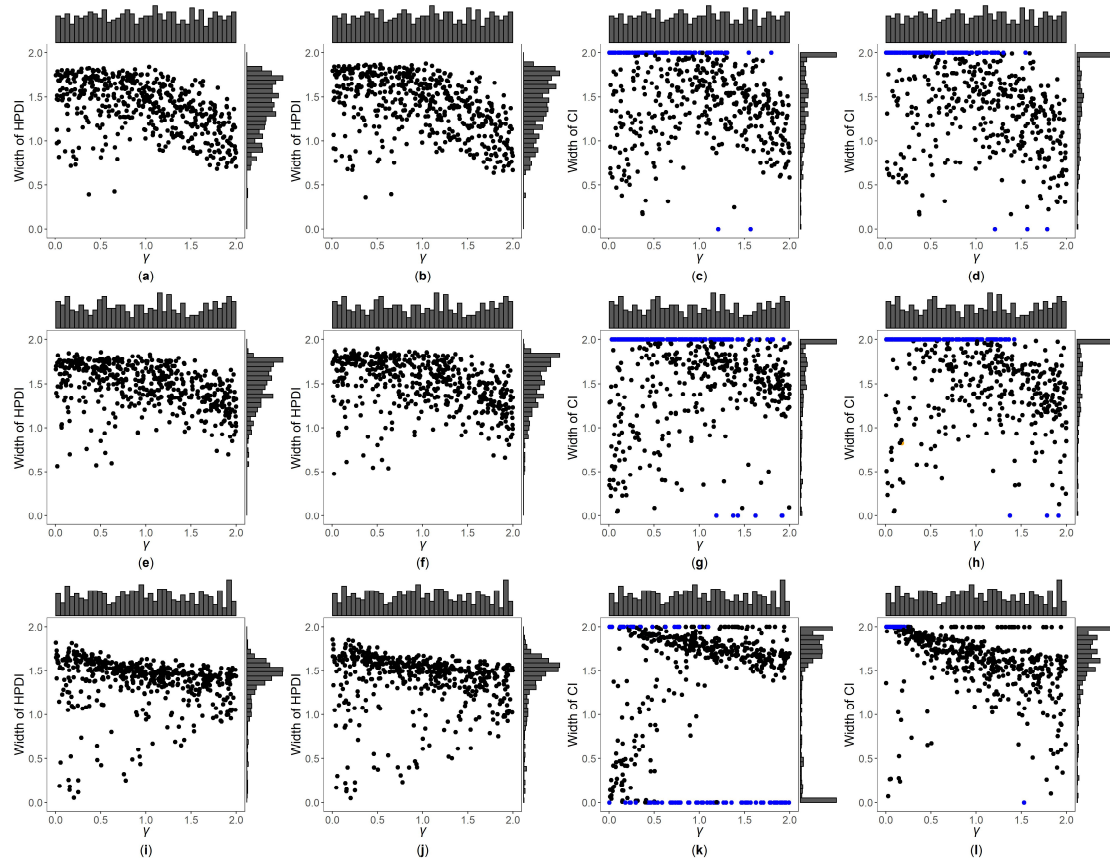

**Figure S12.** Widths of HPDIs or CIs of GBN, GBU, PF and Fieller's methods against true values of  $\gamma$  for qualitative trait with  $n = 2000$  and  $\tau = 1$ . The blue points represent the widths of the empty sets or the noninformative intervals, and the orange points represent the widths of the discontinuous intervals. (a) GBN with  $\eta = 0$ ; (b) GBU with  $\eta = 0$ ; (c) PF with  $\eta = 0$ ; (d) Fieller with  $\eta = 0$ ; (e) GBN with  $\eta = 0.4$ ; (f) GBU with  $\eta = 0.4$ ; (g) PF with  $\eta = 0.4$ ; (h) Fieller with  $\eta = 0.4$ ; (i) GBN with  $\eta = 1$ ; (j) GBU with  $\eta = 1$ ; (k) PF with  $\eta = 1$ ; (l) Fieller with  $\eta = 1$ .

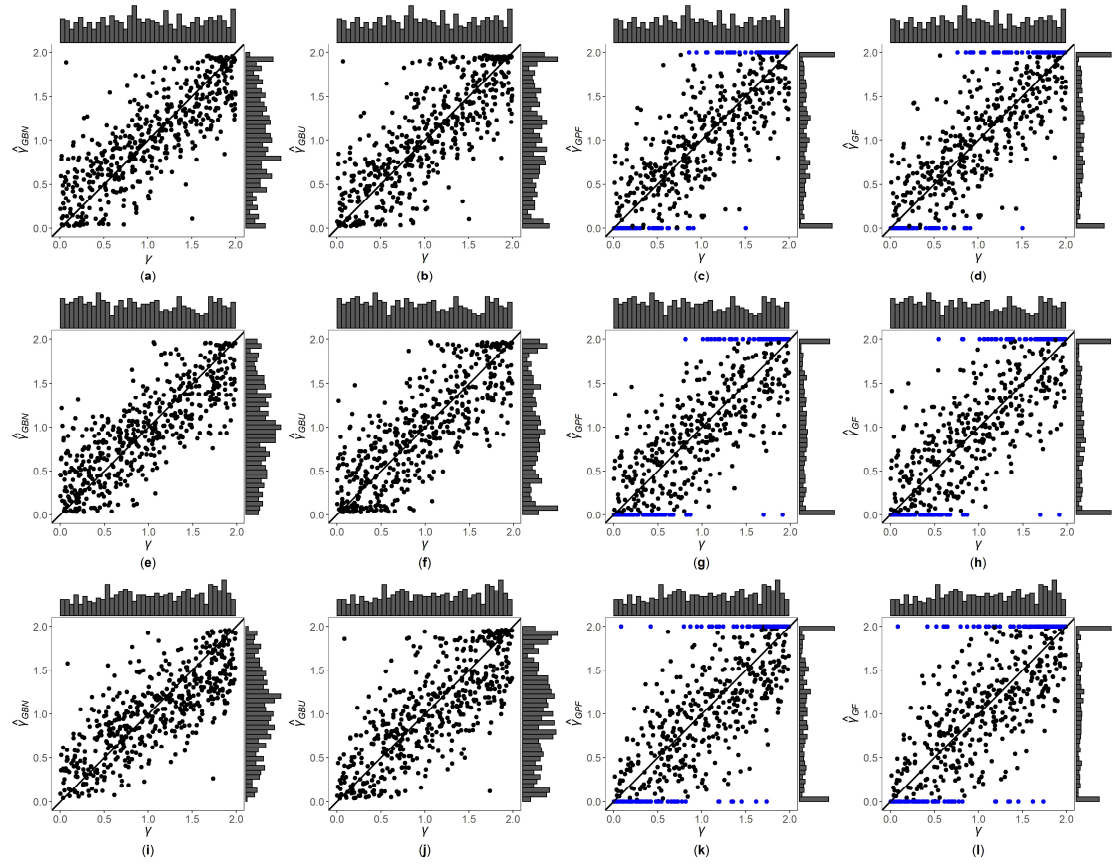

**Figure S13.** Scatter plots of point estimates of  $\gamma$  against true values of  $\gamma$  for quantitative trait with  $n = 2000$ ,  $\tau = 0.6$  and  $\sigma = 2$ . The blue points represent the extreme values (0 or 2). (a)  $\hat{\gamma}_{GBN}$  with  $\eta = 0$ ; (b)  $\hat{\gamma}_{GBU}$  with  $\eta = 0$ ; (c)  $\hat{\gamma}_{GPF}$  with  $\eta = 0$ ; (d)  $\hat{\gamma}_{GF}$  with  $\eta = 0$ ; (e)  $\hat{\gamma}_{GBN}$  with  $\eta = 0.4$ ; (f)  $\hat{\gamma}_{GBU}$  with  $\eta = 0.4$ ; (g)  $\hat{\gamma}_{GPF}$  with  $\eta = 0.4$ ; (h)  $\hat{\gamma}_{GF}$  with  $\eta = 0.4$ ; (i)  $\hat{\gamma}_{GBN}$  with  $\eta = 1$ ; (j)  $\hat{\gamma}_{GBU}$  with  $\eta = 1$ ; (k)  $\hat{\gamma}_{GPF}$  with  $\eta = 1$ ; (l)  $\hat{\gamma}_{GF}$  with  $\eta = 1$ .

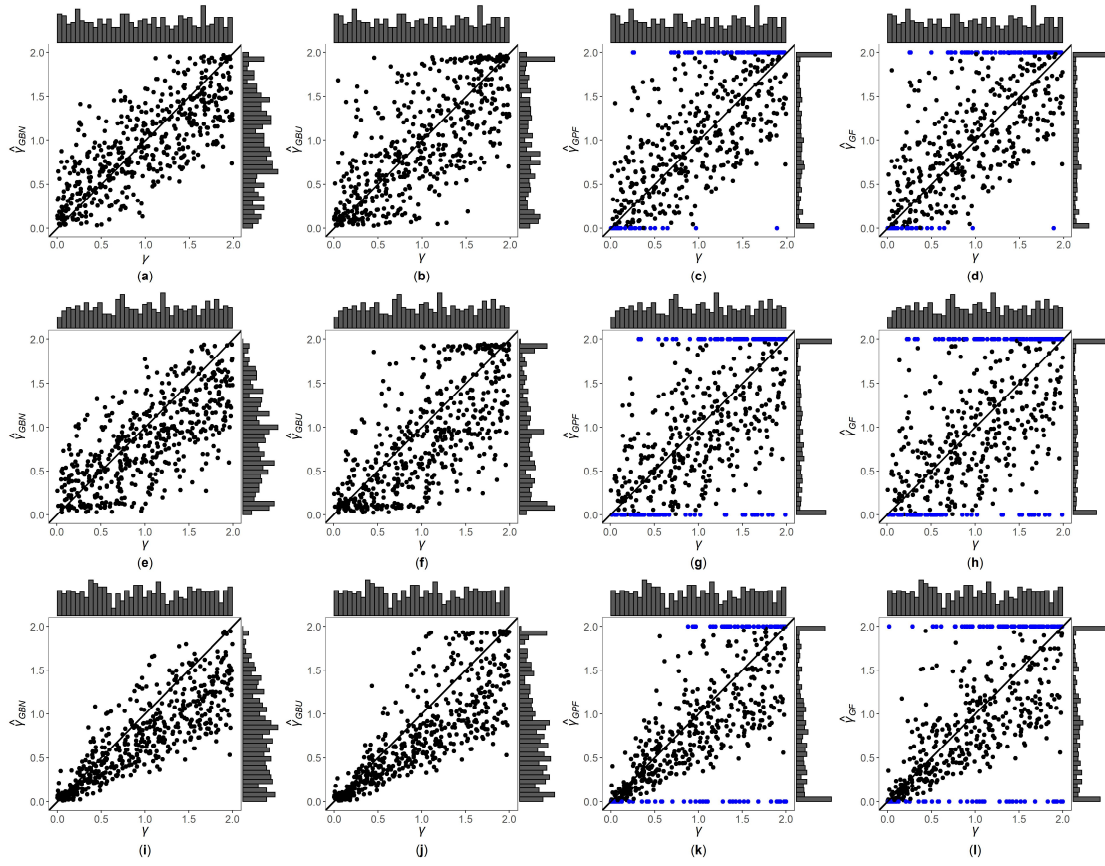

**Figure S14.** Scatter plots of point estimates of  $\gamma$  against true values of  $\gamma$  for quantitative trait with  $n = 2000$ ,  $\tau = 1$  and  $\sigma = 2$ . The blue points represent the extreme values (0 or 2). (a)  $\hat{\gamma}_{GBN}$  with  $\eta = 0$ ; (b)  $\hat{\gamma}_{GBU}$  with  $\eta = 0$ ; (c)  $\hat{\gamma}_{GPF}$  with  $\eta = 0$ ; (d)  $\hat{\gamma}_{GF}$  with  $\eta = 0$ ; (e)  $\hat{\gamma}_{GBN}$  with  $\eta = 0.4$ ; (f)  $\hat{\gamma}_{GBU}$  with  $\eta = 0.4$ ; (g)  $\hat{\gamma}_{GPF}$  with  $\eta = 0.4$ ; (h)  $\hat{\gamma}_{GF}$  with  $\eta = 0.4$ ; (i)  $\hat{\gamma}_{GBN}$  with  $\eta = 1$ ; (j)  $\hat{\gamma}_{GBU}$  with  $\eta = 1$ ; (k)  $\hat{\gamma}_{GPF}$  with  $\eta = 1$ ; (l)  $\hat{\gamma}_{GF}$  with  $\eta = 1$ .

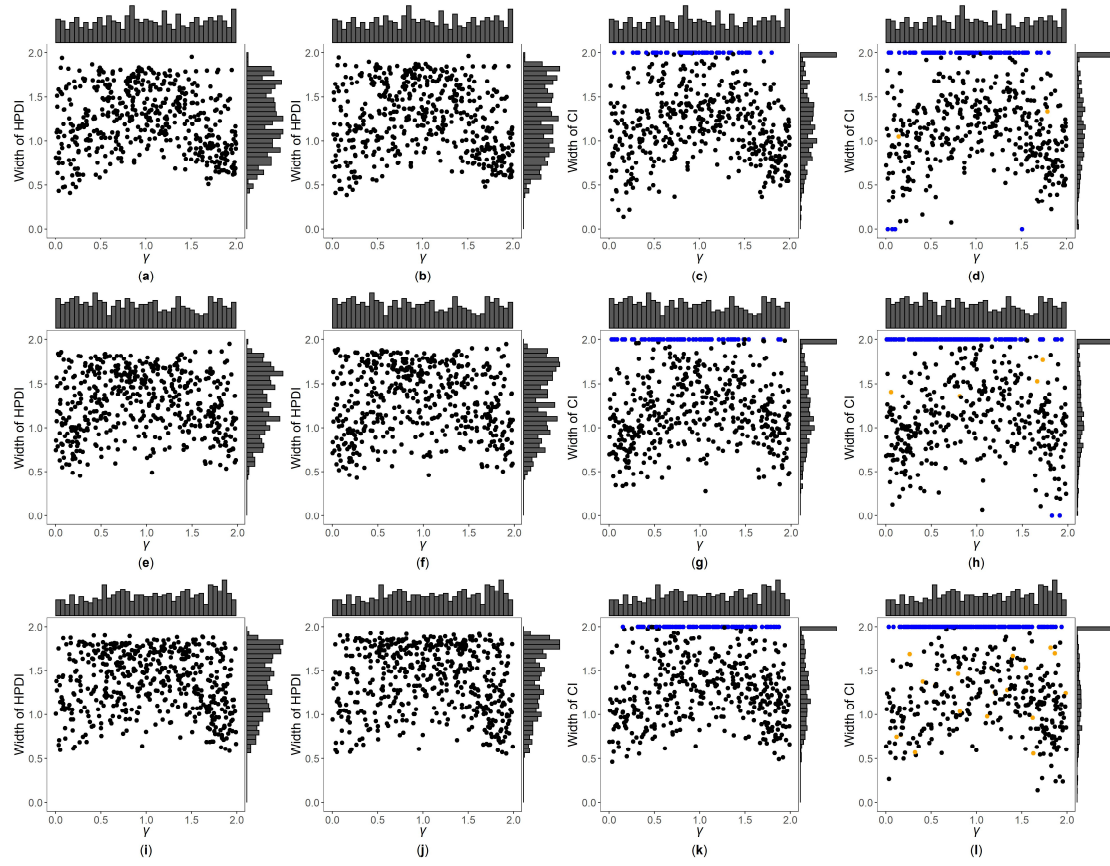

**Figure S15.** Widths of HPDIs or CIs of GBN, GBU, PF and Fieller's methods against true values of  $\gamma$  for quantitative trait with  $n = 2000$ ,  $\tau = 0.6$  and  $\sigma = 2$ . The blue points represent the widths of the empty sets or the noninformative intervals, and the orange points represent the widths of the discontinuous intervals. (a) GBN with  $\eta = 0$ ; (b) GBU with  $\eta = 0$ ; (c) PF with  $\eta = 0$ ; (d) Fieller with  $\eta = 0$ ; (e) GBN with  $\eta = 0.4$ ; (f) GBU with  $\eta = 0.4$ ; (g) PF with  $\eta = 0.4$ ; (h) Fieller with  $\eta = 0.4$ ; (i) GBN with  $\eta = 1$ ; (j) GBU with  $\eta = 1$ ; (k) PF with  $\eta = 1$ ; (l) Fieller with  $\eta = 1$ .

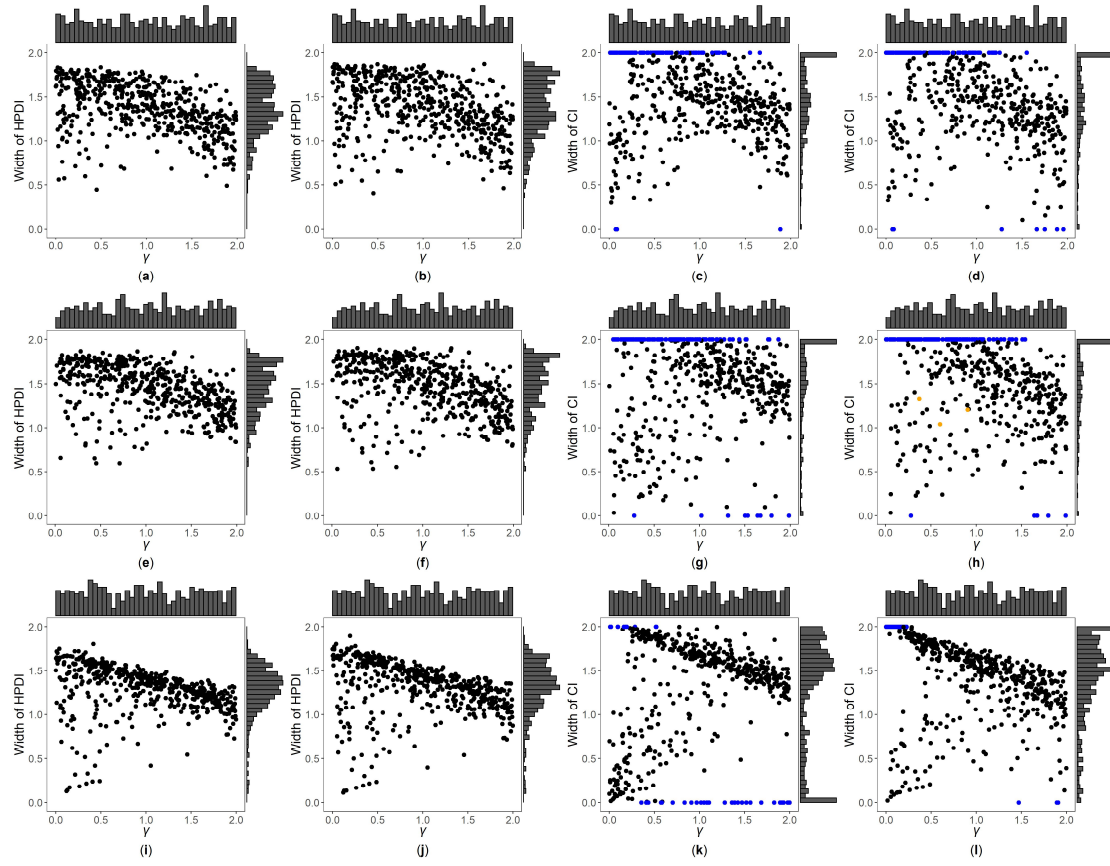

**Figure S16.** Widths of HPDIs or CIs of GBN, GBU, PF and Fieller's methods against true values of  $\gamma$  for quantitative trait with  $n = 2000$ ,  $\tau = 1$  and  $\sigma = 2$ . The blue points represent the widths of the empty sets or the noninformative intervals, and the orange points represent the widths of the discontinuous intervals. (a) GBN with  $\eta = 0$ ; (b) GBU with  $\eta = 0$ ; (c) PF with  $\eta = 0$ ; (d) Fieller with  $\eta = 0$ ; (e) GBN with  $\eta = 0.4$ ; (f) GBU with  $\eta = 0.4$ ; (g) PF with  $\eta = 0.4$ ; (h) Fieller with  $\eta = 0.4$ ; (i) GBN with  $\eta = 1$ ; (j) GBU with  $\eta = 1$ ; (k) PF with  $\eta = 1$ ; (l) Fieller with  $\eta = 1$ .
